# Supplementary material
Source: PubMed Central journal article supplement (PMC3422007)
Supplement: MCB.00180-12_zmb999109631so1.pdf [file MCB.00180-12_zmb999109631so1.pdf]

**Table A.** Primers used in in the GeneTailor™ site-directed mutagenesis reactions

| Expression Plasmid                             | Mutation Site  | Template                                       | Primers (Forward –mutations sites are underlined- and Reverse)                                           |
|------------------------------------------------|----------------|------------------------------------------------|----------------------------------------------------------------------------------------------------------|
| pcDNA3.1-mNrf2 <sup>?</sup> ETGE 2S/2A-V5/HisB | S335A<br>S338A | pcDNA3.1-mNrf2 <sup>?</sup> ETGE -V5/HisB      | 5'-GAATTCAATGACTCTGAC <u>GCTGGCATTGCA</u> CTGAACACGA-3'<br>5'-GTCAGAGTCATTGAATTCCATTGTGCCTTC-3'          |
| EYFP-Nrf2 <sup>(317-372)</sup> 2S/2A-V5        | S335A<br>S338A | EYFP-Nrf2 <sup>(317-372)</sup> -V5             | 5'-GAATTCAATGACTCTGAC <u>GCTGGCATTGCA</u> CTGAACACGA-3'<br>5'-GTCAGAGTCATTGAATTCCATTGTGCCTTC-3'          |
| pcDNA3.1-mNrf2 <sup>?</sup> ETGE S335A-V5/HisB | S335A          | pcDNA3.1-mNrf2 <sup>?</sup> ETGE -V5/HisB      | 5'-TGGAATTCAATGACTCTGAC <u>GCTGGCATTTCAC</u> -3'<br>5'- GTCAGAGTCATTGAATTCCATTGTGCCTTC-3'                |
| pcDNA3.1-mNrf2 <sup>?</sup> ETGE S338A-V5/HisB | S338A          | pcDNA3.1-mNrf2 <sup>?</sup> ETGE -V5/HisB      | 5'-ATGACTCTGACTCTGGCATT <u>GCA</u> CTGAACACGA -3'<br>5'-AATGCCAGAGTCAGAGTCATTGAATTCCAT -3'               |
| pcDNA3.1-mNrf2 <sup>?</sup> ETGE 4S/4A-V5/HisB | S342A<br>S347A | pcDNA3.1-mNrf2 <sup>?</sup> ETGE 2S/2A-V5/HisB | 5'-CTGGCATTGCACTGAACACGG <u>CTCCCAGCCGAGCGGCC</u> CCAGAGCACT-3'<br>5'-CGTGTTCAAGTGCAATGCCAGCGTCAGAGTC-3' |
| EYFP-Nrf2 <sup>(317-372)</sup> 4S/4A-V5        | S342A<br>S347A | EYFP-Nrf2 <sup>(317-372)</sup> 2S/2A-V5        | 5'-CTGGCATTGCACTGAACACGG <u>CTCCCAGCCGAGCGGCC</u> CCAGAGCACT-3'<br>5'-CGTGTTCAAGTGCAATGCCAGCGTCAGAGTC-3' |
| EYFP-Nrf2 <sup>(317-372)</sup> S342A/S347A-V5  | A335S<br>A338S | EYFP-Nrf2 <sup>(317-372)</sup> 4S/4A-V5        | 5'-GAATTCAATGACTCTGACT <u>CTGGCATTTC</u> ACTGAACACG-3'<br>5'-GTCAGAGTCATTGAATTCCATTGTGCCTTC-3'           |
| pcDNA3-Flag-β-TrCP1 <sup>R285E</sup>           | R285E          | pcDNA3-Flag-β-TrCP1                            | 5'-AGAAAATAGTAAGCGGCCTT <u>GAA</u> GACAACACAA-3'<br>5'-AAGGCCGCTTACTATTTTCTGATCATA-3'                    |
| pcDNA3-Flag-β-TrCP1 <sup>R410E</sup>           | R410E          | pcDNA3-Flag-β-TrCP1                            | 5'- TTGTTTCTGCATCTGGGGAT <u>GAA</u> ACTATAAAGG-3'<br>5'- ATCCCCAGATGCAGAAACAATGTACTTGTGTC-3'             |
| pcDNA3-Flag-β-TrCP1 <sup>R431E</sup>           | R431E          | pcDNA3-Flag-β-TrCP1                            | 5'-GGACCTTAAATGGACACAAAG <u>AA</u> GGCATTGCCT-3'<br>5'- TTTGTGTCCATTTAAGGTCCTTACAAATTC-3'                |
| pcDNA3-Flag-β-TrCP1 <sup>R474E</sup>           | R474E          | pcDNA3-Flag-β-TrCP1                            | 5'- AAGGCCATGAGGAATTGGT <u>GAA</u> TGTATTTCGAT-3'<br>5'- CACCAATTCCTCATGGCCTTCTAACACTCG-3'               |
| pcDNA3-Flag-β-TrCP1 <sup>R521E</sup>           | R521E          | pcDNA3-Flag-β-TrCP1                            | 5'-CCTTGTGGAGCATTCCGG <u>AGA</u> AGTTTTTTCGAC-3'<br>5'-TCCGGAATGCTCCACAAGGGTCCGTAGACA-3'                 |
