# Supplementary material
Source: PubMed Central journal article supplement (PMC3422007)
Supplement: MCB.00180-12_zmb999109631so2.pdf [file MCB.00180-12_zmb999109631so2.pdf]

Table B. Primers used in quantitative polymerase chain reactions.

| Gene Product   | Forward Primer                | Reverse Primer                 |
|----------------|-------------------------------|--------------------------------|
| GSK3 $\beta$   | 5'-AGAGATAAAGATGGCAGCAAGG-3'  | 5'-ATCCATTTCCAATCACTTTTCG-3'   |
| GSK3 $\alpha$  | 5'-ACAGCGGGAAGGTGACCACAGTG-3' | 5' AAGTACCGCAGCCTCACAATA-3'    |
| GSTM5          | 5'-GAGAAGCAGAAGCCAGAGT-3'     | 5'-ATACGATACTGGTCAAGAAT-3'     |
| HO-1           | 5'-CACAGATGGCGTCACTTCGTC-3'   | 5'-GTGAGGACCCACTGGAGGAG-3'     |
| GCLM           | 5'-TTACCGAGGCTACGTGTCAGAC-3'  | 5'-TATCGATGGTCAGGTCGATGTC-3'   |
| GCLC           | 5'-AATCAGCCCCGATTTAGTCAGG-3'  | 5'-CCAGCTGTGCAACTCCAAGGAC-3'   |
| $\beta$ -actin | 5'-TCCTTCCTGGGCATGGAG-3'      | 5'-AGGAGGAGCAATGATCTTGATCTT-3' |
