# Supplementary material
Source: PubMed Central journal article supplement (PMC3422007)
Supplement: MCB.00180-12_zmb999109631so3.pdf [file MCB.00180-12_zmb999109631so3.pdf]

**Table C.**  $^1\text{H}$  NMR chemical shifts of the free 4P-hNrf2 peptide in ppm from TSP-d4. Spectra were recorded at 280 K, pH = 7.2, and 20 mM sodium phosphate buffer;  $\text{H}_2\text{O}:\text{D}_2\text{O}$ , 9:1 (v/v).

| Residue | Peptide                | NH   | $\alpha\text{H}$ | $\beta\text{H}$ | Others                                                                          |
|---------|------------------------|------|------------------|-----------------|---------------------------------------------------------------------------------|
|         | $\text{CH}_3\text{CO}$ | -    | -                | -               | $\text{CH}_3$ 2.12                                                              |
| P333    | P1                     | -    | 4.42             | 2,46            | $\gamma\text{CH}_2$ 2.05; $\delta\text{CH}_2$ 3.38                              |
| E334    | E2                     | 8.96 | 4.37             | 1.94; 2.08      | $\gamma\text{CH}_2$ 2.30                                                        |
| S335    | S3                     | 8.72 | 4.51             | 3.87            |                                                                                 |
| T336    | T4                     | 8.37 | 4.34             | 4.29            | $\gamma\text{CH}_3$ 1.19                                                        |
| A337    | A5                     | 8.38 | 4.30             | 1.32            |                                                                                 |
| E338    | E6                     | 8.34 | 4.17             | 1.89; 2.08      | $\gamma\text{CH}_2$ 2.14; 2.23                                                  |
| F339    | F7                     | 8.33 | 4.60             | 3.00; 3.12      | $\delta\text{H}$ 7.25; $\epsilon\text{H}$ 7.33; $\zeta\text{H}$ 7.28            |
| N340    | N8                     | 8.46 | 4.67             | 2.68; 2.79      | $\gamma\text{NH}_2$ 7.02; 7.71                                                  |
| D341    | D9                     | 8.44 | 4.62             | 2,74            |                                                                                 |
| S342    | S10                    | 8.35 | 4.45             | 3.83; 3.92      |                                                                                 |
| D343    | D11                    | 8.52 | 4.70             | 2.75; 2.84      |                                                                                 |
| pS344   | pS12                   | 8.86 | 4.53             | 4.08            |                                                                                 |
| G345    | G13                    | 8.59 | 3.96             | -               |                                                                                 |
| I346    | I14                    | 7.94 | 4.20             | 1.92            | $\gamma\text{CH}_2$ ; 1.19; $\gamma\text{CH}_3$ 0.95; $?\delta\text{CH}_3$ 0.89 |
| pS347   | pS15                   | 8.76 | 4.54             | 4.08            |                                                                                 |
| L348    | L16                    | 8.45 | 4.33             | 1.64            | $\gamma\text{H}$ 1.60; $\delta\text{CH}_3$ 0.87; 0.92                           |
| N349    | N17                    | 8.50 | 4.76             | 2.75; 2.84      | $\gamma\text{NH}_2$ 7.06; 7.78                                                  |
| T350    | T18                    | 8.24 | 4.32             | 4.25            | $\gamma\text{CH}_3$ 1.20                                                        |
| pS351   | pS19                   | 8.64 | 4.85             | 4.10            |                                                                                 |
| P352    | P20                    | -    | 4.44             | 2,30            | $\gamma\text{CH}_2$ 1.93; $\delta\text{CH}_2$ 3.87                              |
| S353    | S21                    | 8.53 | 4.50             | 3.84            |                                                                                 |
| V354    | V22                    | 8.30 | 4.15             | 2.07            | $\gamma\text{CH}_3$ 0.92                                                        |
| A355    | A23                    | 8.46 | 4.31             | 1.37            |                                                                                 |
| pS356   | pS24                   | 8.62 | 4.85             | 4.10            |                                                                                 |
| P357    | P25                    | -    | 4.37             | 2,31            | $\gamma\text{CH}_2$ 1.86; $\delta\text{CH}_2$ 3.79                              |
| E358    | E26                    | 8.67 | 4.17             | 1.96; 2.01      | $\gamma\text{CH}_2$ 2.29; 2.33                                                  |
| H359    | H27                    | 8.60 | 4.73             | 3.19; 3.29      | $\delta\text{H}$ 7.30; $\epsilon\text{H}$ 8.59                                  |
| S360    | S28                    | 8.58 | 4.46             | 3.84            |                                                                                 |
| V361    | V29                    | 8.43 | 4.18             | 2.13            | $\gamma\text{CH}_3$ 0.96                                                        |
| E362    | E30                    | 8.15 | 4.16             | 1.87            | $\gamma\text{CH}_2$ 2.04; 2.27                                                  |
|         | $\text{CONH}_2$        | -    | -                | -               | 7.11; 7.59                                                                      |
