# Supplementary material
Source: PubMed Central journal article supplement (PMC3422007)
Supplement: MCB.00180-12_zmb999109631so4.pdf [file MCB.00180-12_zmb999109631so4.pdf]

**Table D.**  $^1\text{H}$  NMR chemical shifts of the free 2P-hNrf2 peptide in ppm from TSP-d4. Spectra were recorded at 280 K, pH = 7.2, and 20 mM sodium phosphate buffer;  $\text{H}_2\text{O}:\text{}^2\text{H}_2\text{O}$ , 9:1 (v/v).

| Residue | Peptide                | NH   | $\alpha\text{H}$ | $\beta\text{H}$ | Others                                                                              |
|---------|------------------------|------|------------------|-----------------|-------------------------------------------------------------------------------------|
|         | $\text{CH}_3\text{CO}$ | -    | -                | -               | $\text{CH}_3$ 2.14                                                                  |
| P333    | P1                     | -    | 4.42             | 2,31            | $\gamma\text{CH}_2$ 2.02; $\delta\text{CH}_2$ 3.67                                  |
| E334    | E2                     | 8.77 | 4.32             | 1.97; 2.10      | $\gamma\text{CH}_2$ 2.32                                                            |
| S335    | S3                     | 8.48 | 4.55             | 3.91            |                                                                                     |
| T336    | T4                     | 8.37 | 4.39             | 4.30            | $\gamma\text{CH}_3$ 1.24                                                            |
| A337    | A5                     | 8.41 | 4.31             | 1.37            |                                                                                     |
| E338    | E6                     | 8.46 | 4.20             | 1.88; 2.09      | $\gamma\text{CH}_2$ 2.20                                                            |
| F339    | F7                     | 8.38 | 4.65             | 3.04; 3.13      | $\delta\text{H}$ 7.26; $\epsilon\text{H}$ 7.36; $\zeta\text{H}$ 7.31                |
| N340    | N8                     | 8.50 | 4.74             | 2.70; 2.81      | $\gamma\text{NH}_2$ 7.05; 7.72                                                      |
| D341    | D9                     | 8.43 | 4.60             | 2,68            |                                                                                     |
| S342    | S10                    | 8.33 | 4.50             | 3.85; 3.95      |                                                                                     |
| D343    | D11                    | 8.55 | 4.73             | 2.71            |                                                                                     |
| pS344   | pS12                   | 8.98 | 4.47             | 4.08            |                                                                                     |
| G345    | G13                    | 8.69 | 3.92; 4.05       | -               |                                                                                     |
| I346    | I14                    | 7.90 | 4.27             | 1.92            | $\gamma\text{CH}_2$ 1.20; 1.46; $\gamma\text{CH}_3$ 0.95; $?\delta\text{CH}_3$ 0.88 |
| pS347   | pS15                   | 8.91 | 4.52             | 4.04            |                                                                                     |
| L348    | L16                    | 8.72 | 4.33             | 1.67            | $\gamma\text{H}$ 1.60; $\delta\text{CH}_3$ 0.93                                     |
| N349    | N17                    | 8.52 | 4.77             | 2.87            | $\gamma\text{NH}_2$ 7.03; 8.05                                                      |
| T350    | T18                    | 8.26 | 4.34             | 4.27            | $\gamma\text{CH}_3$ 1.22                                                            |
| S351    | S19                    | 8.52 | 4.77             | 3,87            |                                                                                     |
| P352    | P20                    | -    | 4.49             | 2,33            | $\gamma\text{CH}_2$ 2.04; $\delta\text{CH}_2$ 3.74                                  |
| S353    | S21                    | 8.58 | 4.46             | 3.87            |                                                                                     |
| V354    | V22                    | 8.29 | 4.16             | 2.10            | $\gamma\text{CH}_3$ 0.95                                                            |
| A355    | A23                    | 8.51 | 4.34             | 1.38            |                                                                                     |
| S356    | S24                    | 8.54 | 4.78             | 3,87            |                                                                                     |
| P357    | P25                    | -    | 4.44             | 2,31            | $\gamma\text{CH}_2$ 2.02; $\delta\text{CH}_2$ 3.76; 3.85                            |
| E358    | E26                    | 8.67 | 4.18             | 1.93            | $\gamma\text{CH}_2$ 2.14; 2.23                                                      |
| H359    | H27                    | 8.36 | 4.64             | 3.12; 3.22      | $\delta^2\text{H}$ 7.12; $\epsilon^1\text{H}$ 8.07                                  |
|         | $\text{CONH}_2$        | -    | -                | -               | 7.27; 7.64                                                                          |
