# Supplementary material
Source: PubMed Central journal article supplement (PMC3422007)
Supplement: MCB.00180-12_zmb999109631so5.pdf [file MCB.00180-12_zmb999109631so5.pdf]

**Table E.**  $^1\text{H}$  NMR chemical shifts of the 4P-hNrf2 peptide in presence of  $\beta$ -TrCP, in ppm from TSP-d4. Ratio 4P-hNrf2 peptide: $\beta$ -TrCP protein = 98:1. Spectra were recorded at 280 K, pH = 7.2, and 20 mM sodium phosphate buffer;  $\text{H}_2\text{O}:\text{D}_2\text{O}$ , 9:1 (v/v).

| Residue | Peptide                | NH   | $\alpha\text{H}$ | $\beta\text{H}$ | Others                                                                                 |
|---------|------------------------|------|------------------|-----------------|----------------------------------------------------------------------------------------|
|         | $\text{CH}_3\text{CO}$ | -    | -                | -               | $\text{CH}_3^*$                                                                        |
| P333    | P1                     | -    | 4.42             | 2,47            | $\gamma\text{CH}_2$ 2.05; $\delta\text{CH}_2$ 3.39                                     |
| E334    | E2                     | 8.81 | 4.20             | 1.92; 2.12      | $\gamma\text{CH}_2$ 2.25                                                               |
| S335    | S3                     | 8.74 | 4.53             | 3.89            |                                                                                        |
| T336    | T4                     | 8.41 | 4.37             | 4.24            | $\gamma\text{CH}_3$ 1.19                                                               |
| A337    | A5                     | 8.43 | 4.28             | 1.36            |                                                                                        |
| E338    | E6                     | 8.42 | 4.20             | 1.87; 2.04      | $\gamma\text{CH}_2$ 2.15; 2.23                                                         |
| F339    | F7                     | 8.35 | 4.63             | 3.02; 3.13      | $\delta\text{H}$ 7,25; $\epsilon\text{H}$ 7.33; $\zeta\text{H}$ 7.28                   |
| N340    | N8                     | 8.49 | 4.71             | 2.69; 2.79      | $\gamma\text{NH}_2$ 7.05; 7.72                                                         |
| D341    | D9                     | 8.43 | 4.58             | 2,68            |                                                                                        |
| S342    | S10                    | 8.31 | 4.48             | 3.83; 3.92      |                                                                                        |
| D343    | D11                    | 8.54 | 4.70             | 2.69; 2.77      |                                                                                        |
| pS344   | pS12                   | 8.94 | 4.46             | 4.06            |                                                                                        |
| G345    | G13                    | 8.67 | 4,01             | -               |                                                                                        |
| I346    | I14                    | 7.92 | 4.25             | 1.90            | $\gamma\text{CH}_2$ ; 1,45; 1.19; $\gamma\text{CH}_3$ 0.92; ? $\delta\text{CH}_3$ 0.89 |
| pS347   | pS15                   | 8.91 | 4.50             | 4.03            |                                                                                        |
| L348    | L16                    | 8.64 | 4.34             | 1.63            | $\gamma\text{H}$ 1.59; $\delta\text{CH}_3$ 0.90; 0.95                                  |
| N349    | N17                    | 8.56 | 4.80             | 2.84            | $\gamma\text{NH}_2$ 7.11; 7.91                                                         |
| T350    | T18                    | 8.28 | 4.34             | 4.24            | $\gamma\text{CH}_3$ 1.20                                                               |
| pS351   | pS19                   | 8.85 | 4.82             | 4.04            |                                                                                        |
| P352    | P20                    | -    | 4.45             | 2,30            | $\gamma\text{CH}_2$ 2.04; $\delta\text{CH}_2$ 3.86; 3.78                               |
| S353    | S21                    | 8.50 | 4.43             | 3.86            |                                                                                        |
| V354    | V22                    | 8.34 | 4.16             | 2.08            | $\gamma\text{CH}_3$ 0.87; 0.93                                                         |
| A355    | A23                    | 8.49 | 4.33             | 1.37            |                                                                                        |
| pS356   | pS24                   | 8.89 | 4.76             | 4.07            |                                                                                        |
| P357    | P25                    | -    | 4.38             | 2,33            | $\gamma\text{CH}_2$ 1.86; $\delta\text{CH}_2$ 3.86                                     |
| E358    | E26                    | 8.63 | 4.11             | 1.96; 2.01      | $\gamma\text{CH}_2$ 2.29; 2.33                                                         |
| H359    | H27                    | 8.68 | 4.74             | 3.20; 3.23      | $\delta^2\text{H}$ 7.35; $\epsilon^1\text{H}$ 8.45                                     |
| S360    | S28                    | 8.65 | 4.49             | 3.87            |                                                                                        |
| V361    | V29                    | 8.48 | 4.19             | 2.14            | $\gamma\text{CH}_3$ 0.89; 0.95                                                         |
| E362    | E30                    | 8.17 | 4.12             | 1.87            | $\gamma\text{CH}_2$ 2.03; 2.21                                                         |
|         | $\text{CONH}_2$        | -    | -                | -               | 7.19; 8.29                                                                             |

\*: Proton signal not observed.
