# Supplementary material
Source: PubMed Central journal article supplement (PMC3422007)
Supplement: MCB.00180-12_zmb999109631so6.pdf [file MCB.00180-12_zmb999109631so6.pdf]

**Table F.**  $^1\text{H}$  NMR chemical shifts of the 2P-hNrf2 peptide in presence of  $\beta$ -TrCP, in ppm from TSP-d4. Ratio 2P-hNrf2 peptide: $\beta$ -TrCP protein = 98:1. Spectra were recorded at 280 K, pH = 7.2, and 20 mM sodium phosphate buffer;  $\text{H}_2\text{O}:\text{D}_2\text{O}$ , 9:1 (v/v).

| Residue | Peptide                | NH   | $\alpha\text{H}$ | $\beta\text{H}$ | Others                                                                                |
|---------|------------------------|------|------------------|-----------------|---------------------------------------------------------------------------------------|
|         | $\text{CH}_3\text{CO}$ | -    | -                | -               | $\text{CH}_3$ 2.14                                                                    |
| P333    | P1                     | -    | 4.43             | 2,33            | $\gamma\text{CH}_2$ 2.02; 1.96 $\delta\text{CH}_2$ 3.68                               |
| E334    | E2                     | 8.78 | 4.32             | 1.98; 2.12      | $\gamma\text{CH}_2$ 2.33                                                              |
| S335    | S3                     | 8.50 | 4.56             | 3.92            |                                                                                       |
| T336    | T4                     | 8.37 | 4.40             | 4.31            | $\gamma\text{CH}_3$ 1.24                                                              |
| A337    | A5                     | 8.41 | 4.32             | 1.38            |                                                                                       |
| E338    | E6                     | 8.46 | 4.21             | 1.89            | $\gamma\text{CH}_2$ 2.10; 2.21                                                        |
| F339    | F7                     | 8.38 | 4.65             | 3.06; 3.14      | $\delta\text{H}$ 7,28; $\epsilon\text{H}$ 7.32; $\zeta\text{H}$ 7.37                  |
| N340    | N8                     | 8.50 | 4.74             | 2.72; 2.82      | $\gamma\text{NH}_2$ 7.06; 7.73                                                        |
| D341    | D9                     | 8.43 | 4.62             | 2,70            |                                                                                       |
| S342    | S10                    | 8.33 | 4.51             | 3.86; 3.96      |                                                                                       |
| D343    | D11                    | 8.56 | 4.73             | 2.71; 2.78      |                                                                                       |
| pS344   | pS12                   | 9,02 | 4.48             | 4.08            |                                                                                       |
| G345    | G13                    | 8.70 | 3.94; 4.05       | -               |                                                                                       |
| I346    | I14                    | 7.92 | 4.28             | 1.93            | $\gamma\text{CH}_2$ ; 1,47; 1.21; $\gamma\text{CH}_3$ 0.96; $?\delta\text{CH}_3$ 0.90 |
| pS347   | pS15                   | 8.93 | 4.54             | 4.04            |                                                                                       |
| L348    | L16                    | 8.74 | 4.34             | 1.68            | $\gamma\text{H}$ 1.61; $\delta\text{CH}_3$ 0.90; 0.95                                 |
| N349    | N17                    | 8.55 | 4.80             | 2.87            | $\gamma\text{NH}_2$ 7.05; 8.06                                                        |
| T350    | T18                    | 8.27 | 4.36             | 4.29            | $\gamma\text{CH}_3$ 1.24                                                              |
| S351    | S19                    | 8.53 | 4.78             | 3,87            |                                                                                       |
| P352    | P20                    | -    | 4.50             | 2,35            | $\gamma\text{CH}_2$ 2.06; 1.97 $\delta\text{CH}_2$ 3.75                               |
| S353    | S21                    | 8.59 | 4.47             | 3.88            |                                                                                       |
| V354    | V22                    | 8.30 | 4.18             | 2.11            | $\gamma\text{CH}_3$ 0.96                                                              |
| A355    | A23                    | 8.53 | 4.36             | 1.40            |                                                                                       |
| S356    | S24                    | 8.55 | 4.79             | 3.90            |                                                                                       |
| P357    | P25                    | -    | 4.44             | 2,33            | $\gamma\text{CH}_2$ 2.05; 1.92 $\delta\text{CH}_2$ 3.78                               |
| E358    | E26                    | 8.68 | 4.19             | 1.91; 1.96      | $\gamma\text{CH}_2$ 2.15; 2.25                                                        |
| H359    | H27                    | 8.38 | 4.66             | 3.13; 3.23      | $\delta^2\text{H}$ 7.13; $\epsilon^1\text{H}$ 8.07                                    |
|         | $\text{CONH}_2$        | -    | -                | -               | 7.27; 7.64                                                                            |
