# Supplementary material
Source: PubMed Central journal article supplement (PMC3422007)
Supplement: MCB.00180-12_zmb999109631so7.pdf [file MCB.00180-12_zmb999109631so7.pdf]

|                    |     |                                      |                                  |                       |                          |
|--------------------|-----|--------------------------------------|----------------------------------|-----------------------|--------------------------|
| Homo sapiens       | 1   | MMDLELPPPGLPSQDDMDLIDLWRQDIDLGVSR    | REVFDF                           | QRRKEYELEKQKKLEKERQEQ | LQKEQEKAFQTQLQDLDEE      |
| Mus musculus       | 1   | MMDLELPPPGLPSQDDMDLIDLWRQDIDLGVSR    | REVFDF                           | QRQKDYELKQKKLEKERQEQ  | LQKEQEKAFQFQLQDLDEE      |
| Rattus norvegicus  | 1   | MMDLELPPPGLPSQDDMDLIDLWRQDIDLGVSR    | REVFDF                           | QRQKDYELKQKKLEKERQEQ  | LQKEQEKAFQFQLQDLDEE      |
| Bos taurus         | 1   | MMDLELPPPGLPSQDDMDLIDLWRQDIDLGVSR    | REVFDF                           | QRQKDYELKQKKLEKERQEQ  | LQKEQEKAFQFQLQDLDEE      |
| Gallus gallus      | 17  | -----MNLIDLWRQDIDLGVSR               | REVFDF                           | QRQKDYELKQKKLEKERQEQ  | LQKEQEKAFQFQLQDLDEE      |
| Xenopus tropicalis | 1   | MMEIEMPLP-LQSQQDDMDLIDLWKQDIDLGVSR   | REVFDF                           | NRQKENELEKQKKLEKERQEQ | LQKEREKALYAQLQDLDEE      |
| Danio rerio        | 1   | MMEIEMSKMQ-PSQQDDMDLIDLWRQDIDLGVSR   | REVFDF                           | YRQKEVELEKQKKLEKERQEQ | LQKEREKALYAQLQDLDEE      |
| Homo sapiens       | 81  | GEFLP-IQPAQHTQSE                     | SGS-ANYSQV-AHIPK-QDALYFDDCMQLLAE | PPFVDDNEVSSATFQ       | S LVPDIPGHI              |
| Mus musculus       | 81  | GEFLP-IQPAQHTQSE                     | SGS-ANYSQV-AHIPK-QDALYFDDCMQLLAE | PPFVDDHE              | S LALDIPSHAE             |
| Rattus norvegicus  | 81  | GEFLP-IQPAQHTQSE                     | SGS-ANYSQV-AHIPK-QDALYFDDCMQLLAE | PPFVDDHE              | S LALDIPSHAE             |
| Bos taurus         | 81  | GEFLP-IQPAQHTQSE                     | SGS-ANYSQV-AHIPK-QDALYFDDCMQLLAE | PPFVDDNEVSSATFQ       | S LVPDIPSHAE             |
| Gallus gallus      | 80  | GEFVP-AQPAQRVQSEN                    | AEPPISSQS-TDTSKPEEALS            | FDDCMQLLAE            | PPFIDNEASPAAFQ           |
| Xenopus tropicalis | 80  | GEFIP-IQQA--APIE                     | AAVTQELASSIEVPSLVHDLSP           | FCECLKI               | LGETFQLGPAEESLAYQ        |
| Danio rerio        | 80  | GEFLPRSTPLTHTPEAD                    | GGGAGEI                          | QNGAFAEQEAD           | PMSFDECMQLLAE            |
| Homo sapiens       | 157 | IATNQASPE                            | SVAQVAVPVDLDGMQDIEQVWEEEL        | SIPEL-QCLNIENDKLVE    | MVPSPEA-KL               |
| Mus musculus       | 150 | TAPHQAQSLNSSL-EAAMTDLSSIEQDMEQVWQELF | SIPEL-QCLNTENKQLAD               | AVPSPEA-TL            | EMDSNY-HFY               |
| Rattus norvegicus  | 150 | TTPDQAQSLDSSL-ETAMTDLSSIEQDMEQVWQELF | SIPEL-QCLNTENKQAE                | TVPSPEA-TL            | EMDSNY-HFY               |
| Bos taurus         | 157 | TAPPQAQSP                            | LIVQVAVAVLDDMQ-DIEQVWEEEL        | SIPEL-QCLNIENDKLVE    | MVPSPEA-KL               |
| Gallus gallus      | 156 | ISANTQPPSSP-GIVPLTDAENMQ-NIEQVWEEEL  | SIPEL-QCLNIENDKLVE               | STI                   | TSPE-KPAEMHNSY-DY        |
| Xenopus tropicalis | 157 | QSEPNPVPAG                           | ---LSSIPAEGEIMHMQVWEEEL          | SIPEL-QCLNNEIENMVLD   | MYTNQESI                 |
| Danio rerio        | 149 | PSTDLMMPADVP                         | ---AFTQNP                        | LLPGSLDQAWMEL         | SIPELQCLNMPQETLDMN       |
| Homo sapiens       | 233 | FMEKEVGNCSPPHLN                      | FEDFS                            | SIL                   | EDPNQLTVNSLMDA           |
| Mus musculus       | 226 | SLEKEVGNCSPPHLN                      | FEDFS                            | SIL                   | DDASQLT--NSL             |
| Rattus norvegicus  | 226 | SLEKEVGNCSPPHLN                      | FEDFS                            | SIL                   | DDASQLT--NSL             |
| Bos taurus         | 232 | PLDKEVGNCSPPHLN                      | FEDFS                            | SIL                   | EDSSQLTVNSLMSA           |
| Gallus gallus      | 231 | PIMRKDV-NCGPDFLEN                    | IEGPFSS                          | ILQPDSSQLNVNSL        | NSL                      |
| Xenopus tropicalis | 232 | SIEK                                 | ---PHESTV--FSS                   | DLVDTTSSSLP           | ---SVN                   |
| Danio rerio        | 225 | GAQTEV                               | ---CPPEFTNTYR                    | SNMVMV                | PN-MNQLSLNVPDVGAEFGPEEFN |
| Homo sapiens       | 312 | LLNGPIDVSDLS                         | SLCKAFNQNHPES-                   | AEFND                 | SDS                      |
| Mus musculus       | 303 | LLDGTIEGCDLS                         | SLCKAFNPKHAE                     | MEFND                 | SDS                      |
| Rattus norvegicus  | 303 | LLGGPIEGCDLS                         | SLCKAFNPKHAE                     | MEFND                 | SDS                      |
| Bos taurus         | 311 | LLNGPIDVSDLS                         | SLCKAFNQNHPES-                   | AEFND                 | SDS                      |
| Gallus gallus      | 308 | ILSEPIDLSDF                          | PLWRFAFNDDHS-GT                  | VEPCND                | SDS                      |
| Xenopus tropicalis | 298 | LLNDNVDITDL                          | SLCKAFNQNHPES-                   | AEFND                 | SDS                      |
| Danio rerio        | 299 | PPVNPIDLQSF                          | PGD-FSSGKDP                      | IVEFQD                | SDS                      |
| Homo sapiens       | 390 | QNGPKT-PVHSSGDMVQ                    | PLPSQGG                          | THVHDAQCENT           | TEKELPV                  |
| Mus musculus       | 381 | QNGPKAQP                             | PAHSPGD                          | TVQPL                 | PAQGH                    |
| Rattus norvegicus  | 381 | QNGPKAQP                             | PAHSPGD                          | TVQPL                 | PAQGH                    |
| Bos taurus         | 391 | QKGP                                 | TPSVWPPGD                        | PVQPL                 | SSQGN                    |
| Gallus gallus      | 386 | QGNASVYSSRF                          | PDQV                             | ---P                  | VEVPT                    |
| Xenopus tropicalis | 373 | QKPPDNFTA                            | AFTE                             | TYFTL                 | SPVSH                    |
| Danio rerio        | 372 | SDYNEI                               | FPLVY                            | LNDG                  | SSQ                      |
| Homo sapiens       | 469 | PVEKIINLPVDDFNEMM                    | SKEQFNEAQLALIRDIRRRGKNKVA        | AQNCRRKKLEN           | IVELEQDL                 |
| Mus musculus       | 461 | PVEKIINLPVDDFNEMM                    | SKEQFNEAQLALIRDIRRRGKNKVA        | AQNCRRKKLEN           | IVELEQDL                 |
| Rattus norvegicus  | 461 | PVEKIINLPVDDFNEMM                    | SKEQFNEAQLALIRDIRRRGKNKVA        | AQNCRRKKLEN           | IVELEQDL                 |
| Bos taurus         | 471 | PVEKIINLPVDDFNEMM                    | SKEQFNEAQLALIRDIRRRGKNKVA        | AQNCRRKKLEN           | IVELEQDL                 |
| Gallus gallus      | 462 | PVEKIINLPVDDFNEMM                    | SKEQFNEAQLALIRDIRRRGKNKVA        | AQNCRRKKLEN           | IVELEQDL                 |
| Xenopus tropicalis | 453 | SVDKIVNLPVDDFNEMM                    | SKEQFNEAQLALIRDIRRRGKNKVA        | AQNCRRKKLEN           | IVELEQDL                 |
| Danio rerio        | 450 | TVDMIINLPVDDFNEMM                    | SKEQFNEAQLALIRDIRRRGKNKVA        | AQNCRRKKLEN           | IVELEQDL                 |
| Homo sapiens       | 549 | SLHLKQL                              | SLYLEV                           | MLRDE                 | DGKPY                    |
| Mus musculus       | 541 | NLHLKRL                              | SLYLEV                           | MLRDE                 | DGKPY                    |
| Rattus norvegicus  | 541 | NLHLKRL                              | SLYLEV                           | MLRDE                 | DGKPY                    |
| Bos taurus         | 551 | SLHLKQL                              | SLYLEV                           | MLRDE                 | DGKPY                    |
| Gallus gallus      | 542 | SLRQMKQL                             | SLYLEV                           | MLRDE                 | DGKPY                    |
| Xenopus tropicalis | 533 | SLSQKQL                              | GALYMEVFNKLQ                     | DENGQPY               | SPHEYS                   |
| Danio rerio        | 530 | NLKEMKQL                             | SLYQEVF                          | GMLRDENGKAF           | SPNEFS                   |

**Supplemental Material Figure A.** Putative Ser and Thr phosphorylation sites in Nrf2 from vertebrates. Boxes indicate residues that are conserved at least in mammals. Brackets and blue boxes indicate clusters of Ser/Thr residues that might be phosphorylated by GSK-3 with the collaboration of other kinases. These kinases, term priming kinases, create a recognition phospho-motive for GSK-3 in the consensus sequence (S/T) $X_{(1-4)}$ p(S/T), where X is any amino acid and p(S/T) is the Ser/Thr residue that has been previously phosphorylated by the priming kinase. Red boxes indicate Ser residues adjacent to Pro, that might be phosphorylated by GSK-3 without the collaboration of a priming kinase.
