# Supplementary material
Source: PubMed Central journal article supplement (PMC3422007)
Supplement: MCB.00180-12_zmb999109631so8.pdf [file MCB.00180-12_zmb999109631so8.pdf]

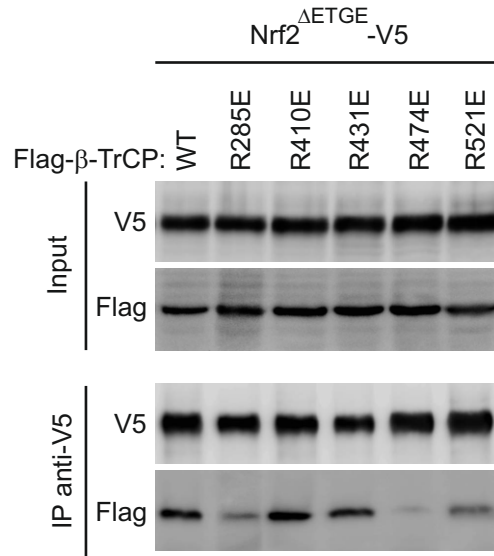

**Supplemental Material Figure B.** *Analysis of critical residues of β-TrCP for Nrf2 docking by pull-down assays.* A, HEK293T cells were co-transfected with V5-tagged tagged Nrf2<sup>ΔETGE</sup> and Flag-tagged β-TrCP with either a wild-type WD40 domain or single point mutations of Arg to Glu at the indicated residues. Cells were maintained in low serum for 16 h and treated with 40 μM MG132 for the last 3 h before the pull-down assay was performed.
